# Supplementary material
Source: bioRxiv or medRxiv preprint supplement (https://medrxiv.org/highwire/filestream/74478/field_highwire_adjunct_files/0/2020.03.17.20037432-1.pdf)
Supplement: Supplementary file [file 2020.03.17.20037432-1.pdf]

**Supplementary Table S1. Comparison of the COVID-19 patients in combination with the drugs.**

| <b>Combined drugs<sup>#</sup></b> | <b>Favipiravir group</b> | <b>Arbidol group</b> | <b>P value</b> |
|-----------------------------------|--------------------------|----------------------|----------------|
| <b>Moderate patients</b>          | N = 98                   | N = 111              |                |
| Total                             | 81 (82.65)               | 93 (83.78)           | 0.8271         |
| Antibiotic                        | 21 (21.43)               | 20 (18.02)           | 0.5355         |
| Antiviral drugs                   | 8 (8.16)                 | 25 (22.52)           | 0.0045         |
| Glucocorticoid                    | 2 (2.04)                 | 8 (7.21)             | 0.1078         |
| Chinese herbal medicine           | 74 (75.51)               | 85 (76.58)           | 0.8569         |
| Psychotropic substances           | 10 (10.20)               | 22 (19.82)           | 0.0540         |
| Immunity enhancing drugs          | 5 (5.10)                 | 15 (13.51)           | 0.0391         |
| Nutritional support               | 17 (17.35)               | 11 (9.91)            | 0.1152         |
| <b>Severe patients</b>            | N = 18                   | N = 9                |                |
| Total                             | 17 (94.44)               | 8 (88.89)            | 1.0000*        |
| Antibiotic                        | 13 (72.22)               | 3 (33.33)            | 1.0000*        |
| Antiviral drugs                   | 3 (16.67)                | 2 (22.22)            | 1.0000*        |
| Glucocorticoid                    | 3 (16.67)                | 2 (22.22)            | 1.0000*        |
| Chinese herbal medicine           | 15 (83.33)               | 7 (77.78)            | 1.0000*        |
| Psychotropic substances           | 4 (22.22)                | 4 (44.44)            | 0.3748         |
| Immunity enhancing drugs          | 3 (16.67)                | 1 (11.11)            | 1.0000*        |
| Nutritional support               | 3 (16.67)                | 1 (11.11)            | 1.0000*        |

\*Fisher's exact test was used for comparison between groups.

<sup>#</sup>Combined drugs:

Antibiotic: Moxifloxacin Hydrochloride Tablets, Cephalosporins

Antiviral drugs: Ribavirin Injection, Chloroquine Phosphate, Recombinant Human Interferon

Chinese herbal medicine: Lianhua Qingwen Jiaonang, Qiangli Pipa Lu

Psychotropic substances: Estazolam Tablets, Alprazolam Tablets, Dexmedetomidine, Diazepam

Immunity enhancing drugs: Human Serum Albumin (HSA), Thymalfasin

Nutritional support: Intacted Protein Enteral Nutrition, Vitamin C/B6/B12/Multivitamin
